## 1 Title

# 2 Better long-term learning ability is predicted by higher surface 3 folding of the human premotor cortex

4 Short title: Individual cortical folding predicts human learning ability

## 5 Authors

6 Marco Taubert,<sup>1,4, 6\*</sup> Gabriel Ziegler,<sup>3,5,6</sup> Nico Lehmann<sup>1,2,6</sup>

## 7 Affiliations

8 <sup>1</sup> Department of Sport Science, Institute III, Faculty of Humanities, Otto von Guericke  
9 University, Zschokkestraße 32, 39104 Magdeburg, Germany.

10 <sup>2</sup> Department of Neurology, Max Planck Institute for Human Cognitive and Brain  
11 Sciences, Stephanstraße 1a, 04103 Leipzig, Germany.

12 <sup>3</sup> Germany German Center for Neurodegenerative Diseases (DZNE), Leipziger Straße 44,  
13 39120 Magdeburg, Germany.

14 <sup>4</sup> Center for Behavioral and Brain Science (CBBS), Otto von Guericke University,  
15 Universitätsplatz 2, 39106 Magdeburg, Germany.

16 <sup>5</sup> Institute of Cognitive Neurology and Dementia Research, Otto von Guericke University,  
17 Leipziger Str. 44, 39120 Magdeburg, Germany.

18 <sup>6</sup> Collaborative Research Center 1436 Neural Resources of Cognition, Otto von Guericke  
19 University, Leipziger Str. 44, 39120 Magdeburg, Germany.

20 \*Corresponding author (email address: [marco.taubert@ovgu.de](mailto:marco.taubert@ovgu.de))  
21 ORCID 0009-0001-8483-5894

## 22 Abstract

23 The capacity to learn enabled the human species to adapt to various challenging  
24 environmental conditions and pass important achievements on to the next generation. A  
25 growing body of research suggests links between neocortical folding and numerous  
26 aspects of human behaviour, but their impact on enhanced human learning capacity  
27 remains unexplored. Here we leverage multiple training cohorts to demonstrate that higher  
28 levels of premotor cortical folding reliably predict individual long-term learning gains in a  
29 challenging new motor task, above and beyond initial performance differences. Individual  
30 folding-related predisposition to motor learning was found to be independent of cortical  
31 thickness and several intracortical microstructural parameters, but dependent on larger  
32 cortical surface area. We further show that learning-relevant features of cortical folding  
33 occurred in close spatial proximity to practice-induced structural plasticity and were  
34 primarily localized in hominoid-specific frontal tertiary sulci. Our results suggest a new  
35 link between neocortical surface folding and human behavioural adaptability.  
36  
37  
38  
39  
40  
41  
42  
43  
44  
45  
46

## 47 Introduction

48 Cortical folding is a highly complex developmental process that depends on the genotype<sup>1</sup>  
49 and reflects the functional organization of the cortex<sup>2-6</sup>, with striking similarities but also  
50 numerous differences between individuals and across species<sup>7,8</sup>. It has been suggested that  
51 cortical folding evolved to fit a larger sheet-like cortex into a compact cranial space and to  
52 keep cortical nerve fiber connections short<sup>9-11</sup>. This evolutionary expansion and folding  
53 of the human neocortex, especially in associative cortices, likely enhanced the  
54 neurocomputational capacities required for complex social interaction, tool-making and  
55 mobility<sup>12</sup>.

56 The impact of cortical folding on behaviour has fascinated early neuroanatomists<sup>13-15</sup> and  
57 stimulates contemporary research in diverse fields such as biology, anthropology or  
58 cognitive neuroscience<sup>12,16-18</sup>. The dominant view is that higher levels of cortical folding  
59 are directly linked to improved cognitive performance both within and across species  
60<sup>11,14,19,20</sup>. The number and interconnectivity of horizontally arranged cortical columns limit  
61 the information processing capacities of neural networks and its potential power for high  
62 cognitive performance<sup>9</sup>. Patients with certain neurodevelopmental disorders present  
63 cortical folding abnormalities and cognitive deficits<sup>21</sup> and cross-sectional studies in  
64 healthy populations demonstrate positive correlations between normative cortical  
65 morphology and behavioural performance (most frequently with parameters of  
66 ‘intelligence’) but with varying small to moderate effect sizes<sup>19,22-25</sup>. However, evidence  
67 for associations between cortical folding and longitudinal trajectories of behavioural  
68 change is still missing. We here exploit multi-cohort longitudinal data to test the  
69 hypothesis that cortical folding in the motor system might form a potential predisposition  
70 for intra-individual performance gains during motor practice.

71 A high level of behavioural performance might result from individual brain and body  
72 development, task-specific practice and/or previous experiences with similar tasks. The  
73 capability to improve performance through practice enabled the human species to adapt to  
74 various challenging environmental conditions and pass important achievements on to the  
75 next generation<sup>26,27</sup>. It has been hypothesized that high human performance does not  
76 directly result from evolved brain features alone, but rather from an interaction between  
77 fertile learning environments (with rich opportunities for self-regulated and socially  
78 mediated learning) and remarkable learning capacities provided by the brain<sup>28,29</sup>. Motor  
79 learning induces brain plasticity<sup>30</sup> but behavioural genetics research also suggests that  
80 practice increases the relative importance of genetic influences on performance and  
81 reduces the effects of environmental variation resulting from different prior experiences  
82<sup>31,32</sup>. Therefore, learning in the human brain appears to be mediated by certain  
83 predispositions and practice-induced neural plasticity in the cortical and subcortical gray  
84 and white matter<sup>22,25,33,34</sup>. However, no study to date investigated whether neocortical  
85 folding relates to motor learning capability. Building on recent developmental studies of  
86 behaviourally relevant features of cortical shape<sup>5</sup>, genetics research on motor learning<sup>31</sup>  
87 and our own work on motor learning-induced cortical plasticity<sup>35</sup>, we hypothesize that  
88 individual variations in cortical folding does predict the individual potential to learn a new  
89 motor task and that such folding variations colocalize with learning-induced neural  
90 plasticity.

91 In the human brain, local geometric features of the cortical surface appear to  
92 fundamentally constrain differences in brain function<sup>36</sup>. Cortical geometric features, such  
93 as local cortical curvature, can be assessed *in-vivo* using magnetic resonance imaging

(MRI). Curvature-based metrics were used in previous cross-sectional studies to relate the local folding properties of cerebral regions to human behavioural performance<sup>37,38</sup> and to individual genotype<sup>39</sup>. Moreover, surface-based metrics of cortical folding, such as local gyrification index, are particularly sensitive to differences in the size of the cortical surface buried within sulci<sup>40,41</sup>. Morphometric analyses of cortical sulci in associative brain regions recently revealed a new role of hominoid-specific tertiary sulcus morphology for cognitive performance<sup>8,41-44</sup>. Here we adopt a multi-scale approach to test the impact of local cortical folding on motor learning in multiple samples. In cortical regions with learning-relevant geometrical features (cortical curvature), we further investigate the contribution of cortical surface area, cortical thickness and intracortical microstructure (assessed using myelin-sensitive magnetization transfer saturation and neurite density index) to cortical geometry as well as the morphometric properties of closely overlapping tertiary sulci.

Specifically, we test for aptitude-treatment interactions<sup>45</sup> to disentangle the contributions of cortical folding either to superior (absolute) performance or adaptive capability (performance gain). The joint analysis of multimodal MRI data from three separate motor learning experiments<sup>35,46-48</sup> allows us to examine individual differences in motor learning in a challenging balance task over a practice period of 4 to 6 weeks<sup>49</sup> (Fig. 1A). We hypothesize that a contribution of cortical folding to superior performance would manifest in positive correlations with absolute performance differences while a contribution to superior learning capability would manifest in positive correlations with intraindividual performance gains (above and beyond initial performance differences).

## Results

### **Long-term motor learning improves performance, reduces intra-individual performance variability and enhances inter-individual performance differences**

Participants learned a whole-body balance task in six practice sessions spread over four to six weeks (Fig. 1A, B). Throughout the practice period motor performance increased continuously (main effect of session  $F(5, 415) = 202.61, p < .001, \eta p^2 = 0.709$ ) with significant performance gains across the six practice sessions (all post-hoc comparisons between time points were significant at  $p < .001$ , Bonferroni corrected for multiple comparisons). Intraindividual (trial-to-trial) variability decreased (main effect of session  $F(5, 415) = 109.89, p < .001, \eta p^2 = 0.570$ , Fig. 1C) and absolute between-person performance differences (IQR) increased during practice (Fig. 1D). We found considerable inter-individual variability in motor learning (Fig. 1E). To relate variations in cortical folding to differences in the rate of motor learning, we first fitted a general power function

$$y(x) = a * x^n$$

to the session-specific mean performance scores of each participant (Fig. 1F). The intercept  $a$  of the power function represents initial performance, while the exponent  $n$  reflects the individual learning rate and  $x$  is time. The general power function yielded an adequate fit to the individual learning data with a median coefficient of determination of  $R^2 = .90$ . In accordance with the literature<sup>50</sup>, initial performance  $a$  negatively predicted learning rate  $n$  ( $R^2 = 0.350, p < .001$ , Fig. S1). We therefore adjusted learning rate  $n$  for

138  
139

inter-individual differences in initial performance  $a$ <sup>51</sup>. We further use term ‘learning rate’ for this during all subsequent analyses.

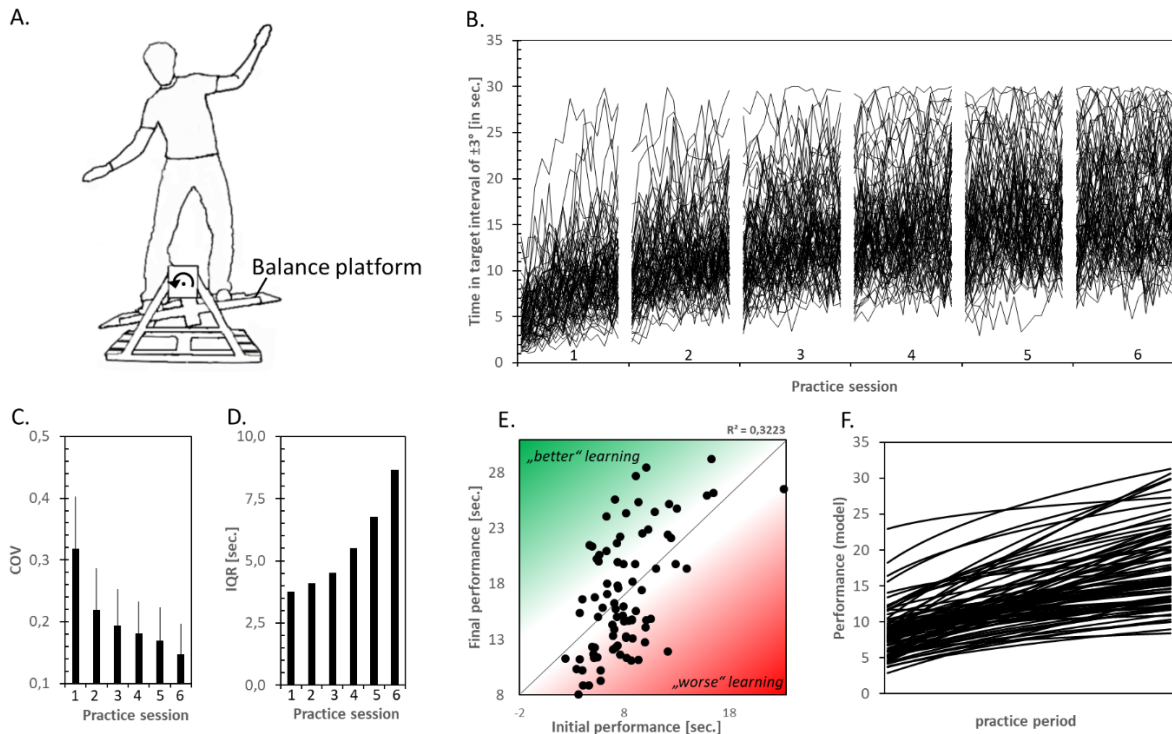

140

### Fig. 1. Behavioural data.

141 Motor learning task, performance improvements, performance stabilization and increased inter-  
142 individual differences in motor learning over 6 practice sessions ( $N=84$ , mean age 24.6 years, age  
143 range 19-35 years, 57 women, mean height 174 cm, height range 153-191 cm, all participants were  
144 right-handed). (A) We tested motor learning of a challenging postural task. Participants were  
145 instructed to keep a seesaw-like moving stabilometer balance platform in a horizontal target  
146 interval ( $\pm 3^\circ$ ) as long as possible during a trial length of 30 s. (B) Motor performance was  
147 measured as the time (in seconds) in which participants kept the board within the target interval in  
148 each of 15 practice trials per session (see Supplemental Video files for motor performance of  
149 participants at the beginning and end of practice). (C) Decrease in trial-to-trial variability  
150 (coefficient of variation, COV) of session-specific motor performance. (D) Increase of the  
151 interquartile range (IQR) of session-specific between-person variation in motor performance. IQR  
152 increased from 3.7 seconds at session 1 to 8.7 seconds at session 6. (E) From the first to the sixth  
153 session, participants tended to maintain their performance rank (correlation between initial and  
154 final performance,  $R^2 = 0.322$ ,  $p < .001$ ) but there were large individual learning differences in  
155 learning (green/red: higher/lower performance than predicted from baseline). (F) Modeled  
156 individual learning curves over sessions using parameters of the power function (see main text).  
157

158

### Cortical folding predicts inter-individual differences in long-term motor learning

159 We quantified vertex-wise cortical curvature to measure local cortical folding<sup>52</sup>. Larger  
160 values indicate higher degrees of local cortical curvature. We then tested for correlations  
161 between higher cortical curvature and steeper learning curve (learning rate  $n$  adjusted for  
162 initial differences  $a$ ), superior initial performance (intercept  $a$ ), higher short-term  
163 adaptations during session 1 and higher asymptotic performance in session 6. All analyses

164 were adjusted for age, gender, body height, study, and total intracranial volume (see  
 165 covariate correlation matrix in Fig. S2).

166 We did not observe significant correlations between local curvature and initial  
 167 performance or short-term adaptations (Figs. S3, S4). Instead, a steeper learning rate  $n$  was  
 168 positively associated with higher cortical curvature in the left pre-  
 169 supplementary/supplementary motor area (pre-SMA/SMA, peak at  $x=-13, y=18, z=63$ ,  
 170  $T=5.97$ , FWE correction at  $p < .05$ , nonparametric t-statistic with 5000 permutations, see  
 171 Figs. 2A,B and S5). The moderate effect size was consistent across the three sub-samples  
 172 (Fig 2C). These positive (sample and subsample) correlations were reproduced in a second  
 173 MRI scan of the same participants (Fig. S6). These subsequent analyses revealed that  
 174 approximately 30% of the variance in adjusted learning rates was explained by differences  
 175 in cortical curvature in pre-SMA/SMA ( $R^2 = 0.30, p < .001, N = 84$ ). The positive  
 176 correlation between curvature and performance or gain increased during practice (Fig.  
 177 2E). In addition, cortical curvature consistently predicted learning rates within  
 178 demographic, anthropometric, and performance-specific subcategories of the dataset (Figs.  
 179 S7 and S8). Asymptotic (final) performance showed a non-significant trend for an  
 180 association with cortical curvature in left pre-SMA/SMA (local maximum at  $x=-15, y=20$ ,  
 181  $z=62, T=4.40$ , FWE-corrected  $p = .053$ ) and a significant association in a small cluster in  
 182 left supramarginal gyrus (local maximum at  $x=-59, y=-56, z=21, T=4.55$ , FWE correction  
 183 at  $p < .05$ , see Fig. S9). In order to confirm the links between cortical folding, learning  
 184 rates and final performance, we used structural equation modeling (see Materials for SEM  
 185 fit indices) to show that the effect of cortical folding on final performance was mediated  
 186 via learning rate  $n$  (Fig. 2D).

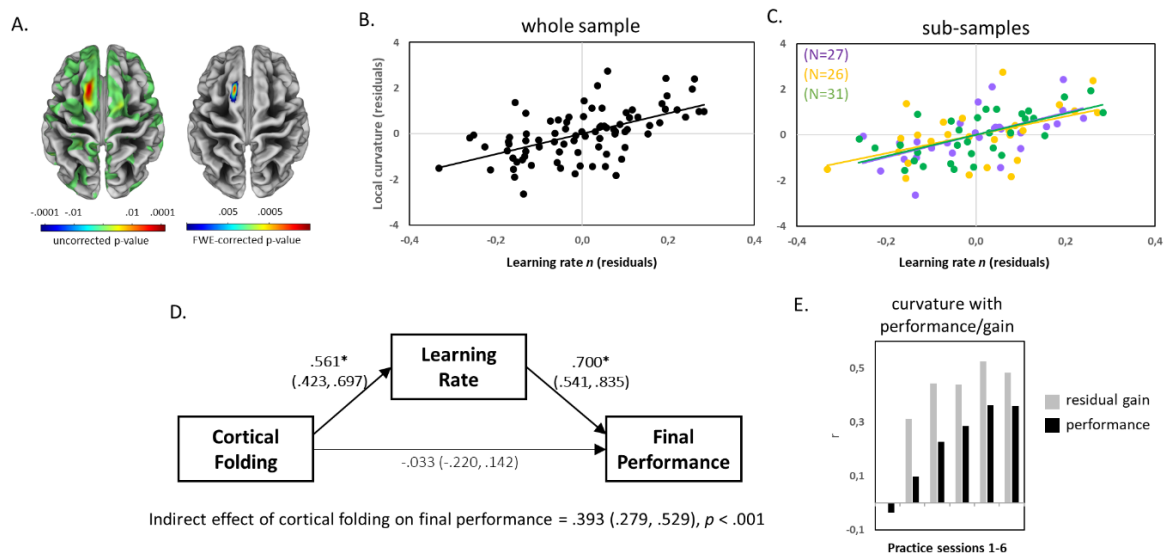

188 **Fig. 2. Cortical folding predicts learning.**

189 Results of whole-brain correlation of vertex-wise cortical curvature and learning rate. (A)  
 190 Uncorrected results at  $p < .001$  (left) and family-wise error-corrected results at  $p < .05$  (right) were  
 191 projected onto a template brain showing variations in sulcus depth. (B) Positive correlation of  
 192 residual cortical folding (in the cluster representing the FWE-corrected effect in the exploratory  
 193 analysis [A]) and learning rate. (C) Subsample results in the three independent learning  
 194 experiments. (D) Structural equation model depicting relationships between cortical folding in pre-  
 195 SMA/SMA (cluster from 2A, unadjusted for  $a$ ), learning rate (adjusted for  $a$ ) and final  
 196 performance on session 6 (unadjusted for  $a$ ). Standardized coefficients with 95% bootstrapped  
 197 confidence intervals (CI) are represented on paths. (E) Pearson correlation coefficients between

198 residualized cortical folding and motor performance (N = 84). Grey bars represent session-specific  
199 performance controlled for initial performance in session 1 (i.e., residual gain) and black bars  
200 represent correlations with actual session-specific performance. \* indicate significant paths at  $p <$   
201 .05 (with CIs not including zero).

### 202 **Individual folding-related predisposition to motor learning was independent of** 203 **cortical thickness, but dependent on cortical surface area**

204 At the macroscopic level, cortical folding depends on the size and thickness of the cortical  
205 sheet (surface area and cortical thickness, see <sup>53</sup>). Thus, we tested the potential  
206 contributions of cortical surface area and cortical thickness to the observed relationship  
207 between cortical folding and learning rate using structural equation modeling (SEM).

208 Modelling results are shown in Figure 3B (see Materials for model fit indices). Within a  
209 larger region encompassing left pre-SMA/SMA (see Methods for ROI description),  
210 cortical surface area, but not cortical thickness, exerted an indirect effect on learning rate  $n$   
211 via folding (indirect effect of surface area on  $n$ : 0.54 [95% CI = .305, .749],  $p < .001$ ; no  
212 indirect effect of thickness on  $n$ : 0.02 [95% CI = -.076, .134],  $p = .686$ ). In the context of  
213 this model, there was a direct effect of cortical folding on learning rate  $n$  ( $R^2 = 0.21$ ).  
214 Figure 3C shows a simple Pearson correlation between cortical folding and  $n$  ( $R^2 = 0.16$ ,  $p$   
215  $< .001$ ). Importantly, the positive relationship between cortical folding and learning rate  $n$   
216 remained significant when adjusting for differences in surface area and cortical thickness  
217 in a partial correlation analysis ( $R^2 = 0.17$ ,  $p < .001$ , Fig. 3D). In order to validate the  
218 effect of premotor cortical curvature on learning rate, we used a surface area-dependent  
219 gyrification index<sup>40</sup> and found a spatial pattern of positive correlation in the same cortical  
220 region (Fig. S10). Thus, while surface area affected cortical folding, surface area-  
221 independent contributions to local cortical geometry also affected learning rate.

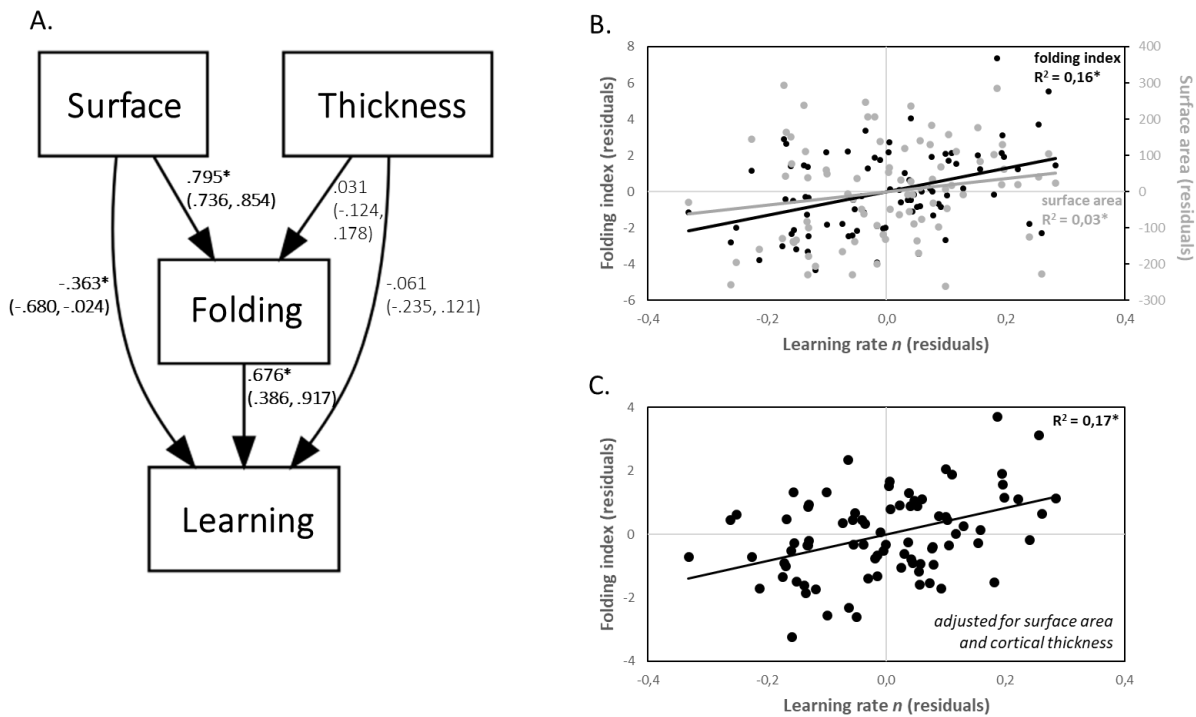

**Fig. 3. Cortical surface area, but not cortical thickness, is related to the effect of cortical folding on learning.**

Interrelationship between folding, thickness and surface area. (A) SEM model depicting the relationships between cortical folding ('folding'), cortical surface area ('surface'), cortical thickness ('thickness'), and learning rate  $n$  ('learning') in the left caudal superior frontal gyrus. Standardized coefficients with 95% bootstrapped CIs are represented on paths. (B and C) Correlations between folding index and surface area with learning rate  $n$ . Folding index is either adjusted (C) or unadjusted (B) for differences in surface area and cortical thickness. Note that all variables used in the model and for correlation analyses were corrected for differences in age, gender, height, study, head coil, baseline performance, and total intracranial volume. \* indicate significant paths/correlations at  $p < .05$  (with CIs not including zero).

### Cortical folding ties to learning rates independent of cortical myelination and cortical neurite density

Cross-species comparisons do suggest that highly convoluted cortices have lower neuronal densities than less convoluted cortices<sup>54</sup>. Also, the folding process in regions developing late during gestation (secondary and tertiary sulci) is likely to be mediated by intracortical microstructure<sup>6</sup> and biomechanical constraints<sup>55</sup>. Intracortical myelination of deep cortical gray matter (GM), as measured by myelin-sensitive magnetization transfer saturation (MT), is a signature of cortical maturation in late adolescence and early adulthood<sup>56,57</sup>. In order to test whether the folding effect on learning rate is significantly influenced by interindividual differences in intracortical microstructure, we measured myelin-sensitive MT saturation in superficial cortical to cortex-adjacent white matter compartments and intracortical neurite density index (NDI) of pre-SMA/SMA ( $N = 26$ ; mean age 22.1 years, range 19-29 years, Fig. 4C). In line with previous studies, we observed a positive correlation between MT, in particularly in deep cortical GM, and chronological age in vertex-wise (Fig. S11) and ROI-wise correlation analyses ( $R^2 = 0.33$ ,  $p = .002$ , Fig. 4D). Importantly, we found no significant correlation between MT and learning rate  $n$  either using mean ROI ( $R^2$  ranged from 0.017 to 0.034,  $p > 0.36$ , Fig. 4E)

or vertex-wise analyses (Fig. S9). Variations in MT had no impact on the association between cortical folding and learning rate  $n$  (partial  $R^2$  ranged from 0.26 to 0.27, all  $p < .009$ , Fig. 4F). In line with the MT analysis, learning rate  $n$  was not related to NDI values in pre-SMA/SMA. These results via imaging proxies indicate that the effect of higher cortical folding on steeper learning curves is less likely to be mediated by lower intracortical myelin content or neurite density across individuals.

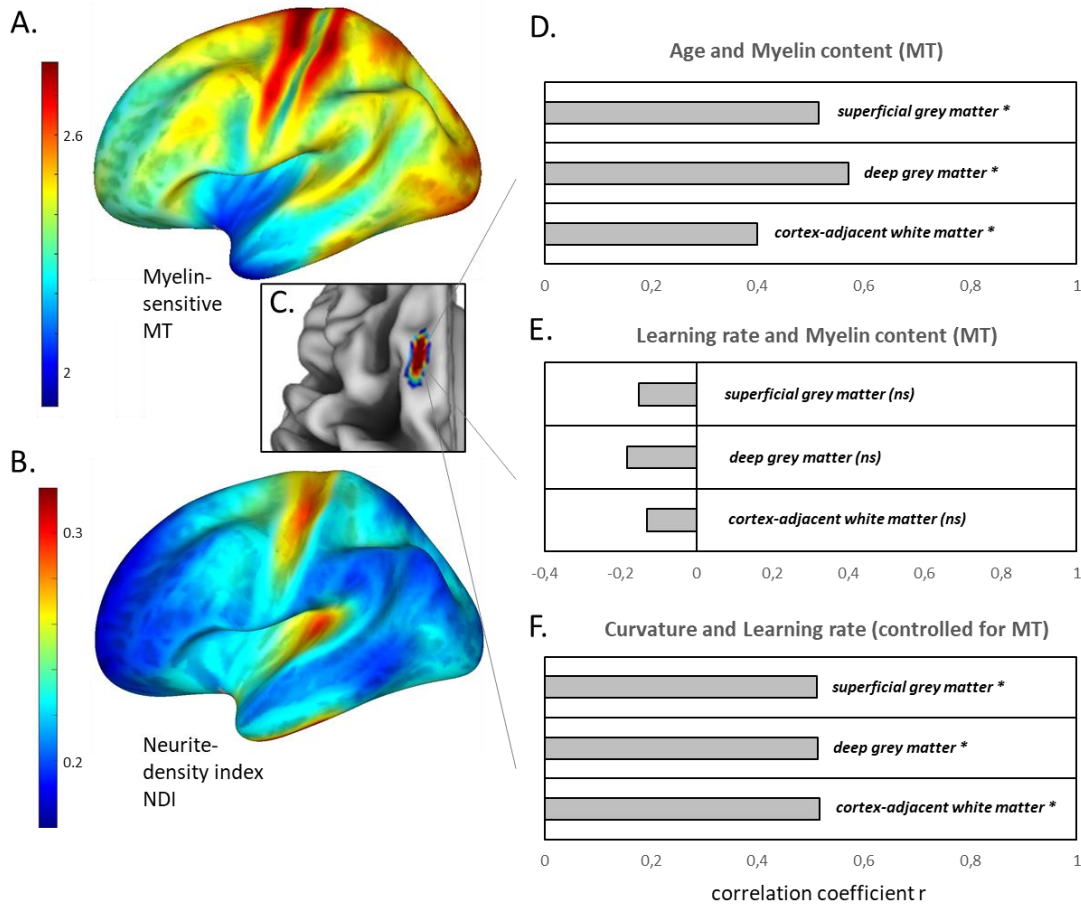

**Fig. 4. Cortical folding ties to learning rates independent of cortical myelination and cortical neurite density.**

Analysis of microstructural tissue properties of the premotor cortex. (A and B) Distribution of myelin-sensitive magnetization transfer saturation (MT) values (A) and the neurite density index NDI (B) across the left hemisphere. Color bars show regions of high MT or NDI in red (e.g., primary motor and somatosensory cortices) and regions of lower MT and NDI in blue (e.g., anterior prefrontal regions). Note the MT product-sequence-specific representation of MT values with a factor of 2. (C) MT and NDI values were analyzed in pre-SMA/SMA, the cluster in which cortical folding positively correlated with learning rate  $n$  (Fig. 2A). (D) Pearson correlations between MT in superficial GM, deep GM, and cortex-adjacent white matter with chronological age. (E) Pearson correlations between MT in superficial GM, deep GM, and cortex-adjacent white matter with learning rate  $n$ . (F) Partial correlations between cortical folding and learning rate adjusted for MT in superficial GM, deep GM, and cortex-adjacent white matter. \* indicate significant correlations at  $p < .05$ , while ns indicates no significant correlation.



281

## Coincident effects of cortical folding and practice-induced plasticity

282

283

284

285

286

287

288

Our previous study showed structural gray matter plasticity in the pre-SMA/SMA after practice of the very same balance task<sup>35</sup> (Fig. 5A left). This gives us the opportunity to test the spatial coincidence of folding predispositions for learning and short-term learning-induced plasticity. Within the clusters that showed gray matter increases across the whole motor practice period (Fig. 2 in<sup>35</sup>), higher cortical curvature in pre-SMA/SMA significantly predicted higher learning rate (peak at  $x=-15, y=18, z=59, T=5.64$ , FWE corrected  $p$ -value = .001, Fig. 5A right).

289

290

291

292

293

294

295

We averaged cortical curvature values within the previously identified pre-SMA/SMA cluster<sup>35</sup> (gray matter increase at MNI coordinate xyz -12 13 64, peak Z-value = 4.35). Average cortical curvature in this cluster predicted individual differences in learning rate ( $R^2 = 0.29, p < .001$  for the whole sample, Fig. 5B). This effect was consistent across the three sub-samples (Fig. 5C). Using SEM of ‘plasticity’ ROI values confirmed the effect of cortical folding on final performance (both unadjusted for  $a$ , Fig. 5D) that was mediated via learning rate  $n$  (adjusted for  $a$ ).

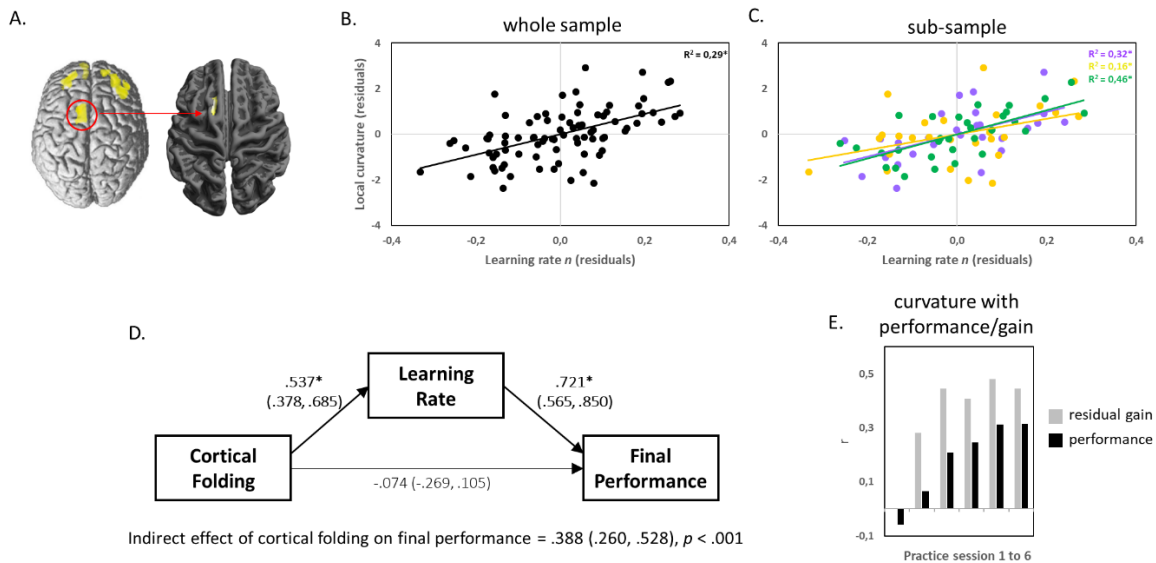

296

297

298

299

300

301

302

303

304

305

306

307

308

309

310

311

### Fig. 5. Cortical folding predicts learning in regions undergoing practice-induced structural plasticity.

Relationship between folding and plasticity in the premotor cortex. (A) Positive correlation of cortical curvature in pre-SMA/SMA (in the cluster of significant learning-induced gray matter changes in<sup>35</sup>) and learning rate. Practice-induced plasticity is depicted across the whole brain on the left side and the overlapping effect of cortical folding on learning rate is shown on the right side (only pre-SMA/SMA was significant). (B and C) Whole-sample and sub-sample correlations between learning rate and cortical curvature in the pre-SMA/SMA cluster in A. (D) SEM depicting the relationship between cortical folding in pre-SMA/SMA, learning rate (adjusted for  $a$ ) and final performance on session 6. Standardized coefficients with 95% bootstrapped confidence intervals (CI) are represented on paths. (E) Pearson correlation coefficients between residualized cortical folding and motor performance. Grey bars represent session-specific performance controlled for initial performance in session 1 (i.e., residual gain) and black bars represent correlations with actual session-specific performance. \* indicate significant correlations/paths at  $p < .05$  (with CIs not including zero).

## Morphology of tertiary sulci predicts learning rate

Recent studies have linked higher cognitive performance to the presence and prominence of tertiary sulci in the frontal cortex of human participants<sup>8,41,44</sup>. Tertiary sulci are small, evolutionarily new cortical structures with great potential for identifying new connections between neuroanatomical substrates and human-specific aspects of cognition<sup>5</sup>. Here we tested whether variations in the presence of tertiary sulci (PaM) in a region encompassing the left caudal superior frontal gyrus affect learning rate via its prominence (sulcal surface area) and folding characteristics.

We used the nomenclature and sulcus labeling methodology of<sup>58</sup> to manually define the sulcal landscape in the left caudal superior frontal gyrus (SFG) and adjacent precentral regions. We labeled 458 sulci in the left hemisphere (labeled sulci for each individual are shown in Figs. S12-S14). According to Germann et al.<sup>58</sup>, the caudal SFG includes major sulci found in each individual brain (Fig. 6A): the interhemispheric fissure (IF), the superior precentral sulcus (SPr), the superior frontal sulcus (SFS), and the central sulcus (CS). The SPr in<sup>58</sup> appeared continuous for 76% of participants and was split in two branches for the remaining 24% of participants. One branch is usually caudal to the SFG and forms the base of the superior frontal sulcus, and the other branch is caudal to the dorsal portion of the middle frontal gyrus. Largely consistent with<sup>58</sup>, we show a continuous SPr in the majority of participants in our sample (65%, 55 out of 84) and the two-branch pattern in 35% of participants (29 out of 84). Germann et al.<sup>58</sup> noted several smaller tertiary sulci that were heterogeneous in presence, appearance, and number (see also Fig. 6A): the medial precentral sulcus (MeP), the marginal precentral sulcus (MaP) as well as the paramidline sulci (PaM) with one or more short portions within caudal SFG oriented parallel to the SFS<sup>13,58</sup>. While MeP and PaM were found in almost every participant within the boundaries of our region-of-interest in caudal SFG, MaP occurred in 66% of participants in<sup>58</sup> and in 50% of the participants (42 out of 84) in our sample. The cluster of vertices representing the effect of cortical curvature on learning rate  $n$  (see Fig. 2A) was anterior to MeP and medial to SFS (see white outline in one participant's left hemisphere in Fig. 6A) and likely colocalized with PaM sulci. Thus, we tested the influence of PaM number and PaM morphology (folding index and surface area) on learning rate  $n$  using a structural equation model (SEM) that extends our above model (illustrated in Figure 3A).

PaM sulci number, PaM surface area, and PaM folding index were submitted to SEM to predict learning rate  $n$  (Fig. 6C). Significant relationships were found for (a) the presence of PaM (number) and PaM surface area, (b) PaM surface area and PaM sulcal folding as well as (c) PaM sulcal folding and learning rate  $n$  (Fig. 6C,D). Importantly, PaM number and surface area indirectly affected learning rate  $n$  via folding (presence: indirect effect of PaM number on  $n$ : 0.09 [95% CI = .006, .192],  $p = .046$ ; prominence: indirect effect of PaM surface area on  $n$ : 0.37 [95% CI = .186, .538],  $p < .001$ ). Moreover, a partial correlation analysis revealed a significant positive correlation between PaM sulcal folding and  $n$  when controlling for PaM number and PaM surface area (partial  $R^2 = 0.12$ ,  $p = .001$ , Fig. 6E).

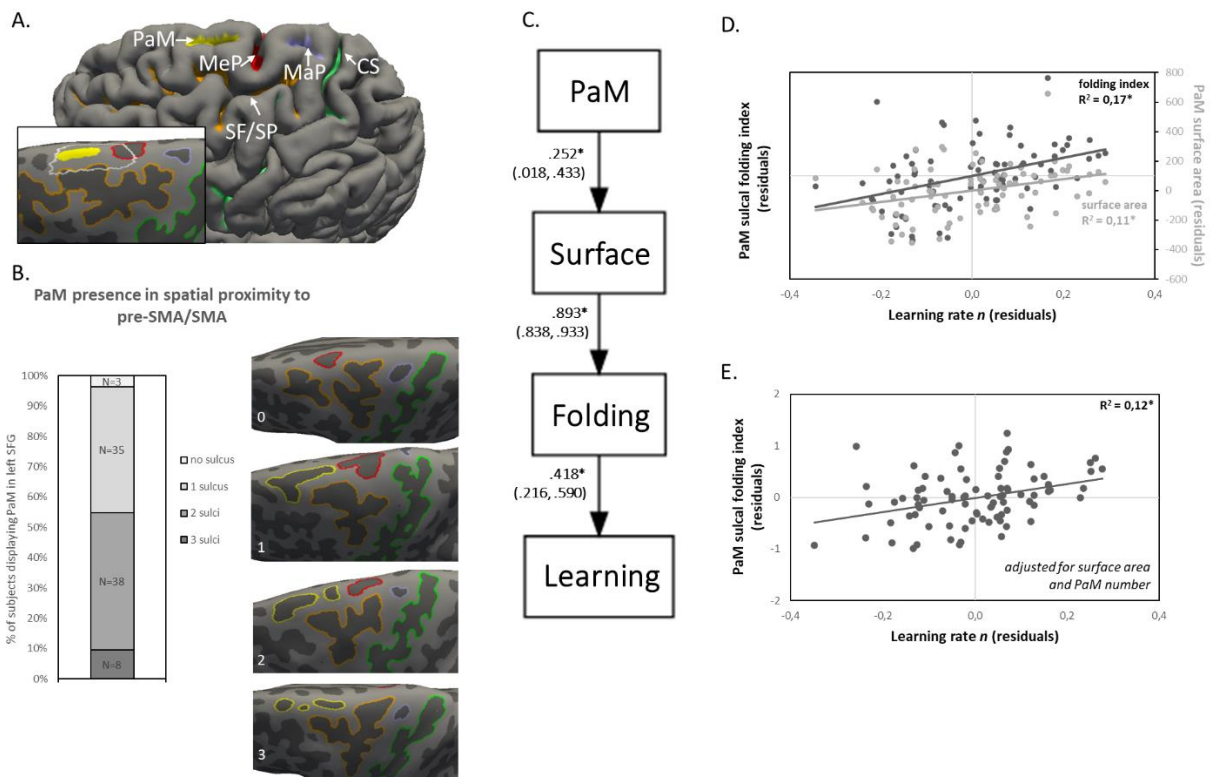

354

355

356

357

358

359

360

361

362

363

364

365

366

367

368

369

370

371

### Fig. 6. The morphology of tertiary sulci predicts individual learning rate.

Analysis of tertiary sulci in the premotor cortex. (A) Labeling of cortical sulci in the left caudal superior frontal gyrus and adjacent precentral regions in a representative participant. Labeled left hemisphere sulci from all participants ( $n = 84$ ) are shown in Figs. S12-S14. (B) The number of paramidline sulci for all participants is shown. The presence of PaM in the left caudal SFG (overlapping with the target cluster thresholded at  $p < .001$ ) varies from PaM absence (no overlap between target cluster and PaM) in three participants to 3 PaM sulci in eight participants ( $N_{\text{absence}} = 3$ ,  $N_{1 \times \text{PaM}} = 35$ ,  $N_{2 \times \text{PaM}} = 38$ ,  $N_{3 \times \text{PaM}} = 8$ ). Surfaces of representative participants per number category (PaM are marked in yellow) are shown on the right-hand side. (C) A model representing the relationships between PaM sulcal folding index (“Folding”), PaM sulcal surface area (“Surface”), PaM sulcal number (“PaM”), and learning rate  $n$  (“Learning”). Standardized coefficients with 95% bootstrapped CIs are represented on paths. (D and E) Correlations between PaM sulcal folding index and learning rate. Folding index is either adjusted (D) or unadjusted (C) for differences in surface area and PaM presence. Note that all variables in the model and correlation analyses were corrected for differences in age, gender, height, head coil, study, baseline performance, and total intracranial volume. \* indicate significant paths/correlations at  $p < .05$  (with CIs not including zero).

372

373

## Discussion

374

375

376

377

378

379

380

381

Given the complexity of mechanisms involved in the expansion and folding of the cerebral cortex, and thus its tremendous costs in terms of genetic, cellular, and histogenic evolution, the ecological advantages of cortical folding must be more than remarkable<sup>59</sup>. Using longitudinal training data, we show that human participants with higher degrees of cortical folding in premotor areas have larger performance gains (steepness of the learning rate) across several sessions of motor practice. Cortical folding had an indirect effect on attained performance levels via its strong impact on performance gain. The observed local associations between performance gain and cortical folding overlapped with practice-

382 induced structural plasticity in premotor areas and with the morphological characteristics  
383 of hominoid-specific tertiary sulci. Higher cortical folding was related to larger cortical  
384 surface area, but not at the expense of lower cortical thickness or intracortical  
385 microstructure. Our results support the hypothesis that higher levels of cortical folding  
386 endow individuals with enhanced adaptive capacities, but not with superior performance  
387 per se.

388 Interindividual differences in global and local folding metrics were correlated with  
389 behavioural performance scores in previous studies involving adult humans  
390 8,19,24,37,38,43,44,60–63. These studies usually assessed cognitive or memory performance at a  
391 single point in time – with intelligence quotient being the most commonly assessed  
392 variable to date. The effect size of brain-behaviour correlations varied considerably but  
393 generally suggest a positive association between higher folding and performance. Using a  
394 longitudinal measure of performance change, we report that approx. 30% of variance in  
395 learning rate are predicted by the degree of local cortical folding in premotor cortical  
396 regions (pre-supplementary/supplementary motor areas). In line with <sup>24</sup>, larger cortical  
397 surface area contributed to the folding effect on learning but there was an additional  
398 significant surface area-independent contribution to cortical folding's relationship with  
399 learning (Figs. 3 and 6). While the technical reproducibility of the folding-learning  
400 relationship (Fig. S6) was expected because of the high stability of non-invasive markers  
401 of external brain morphology, we were surprised by the consistency of positive  
402 correlations within an independent region-of-interest and for smaller sub-samples (Fig. 5C  
403 and S7).

404 We report a comparably large effect size for a brain behavioural study of cortical folding  
405 in adult humans (see correlation coefficients represented in both ROI and vertex-wise  
406 analyses, Figs. 2 and S5). The comparatively long practice time could have favored the  
407 identification of brain-behavioural relationships<sup>64</sup>. We found that associations between  
408 cortical folding and motor performance increased with practice. This can be explained by  
409 the increasing impact of residual gains on absolute performance levels across practice  
410 (Figs. 2E, 5E, S6D). In fact, performance gain mediated the effect of cortical folding on  
411 final performance (Figs. 2D and 5D). This suggests that cortical folding effects on  
412 acquired performance level may be an indirect consequence of cortical folding's  
413 relationship with an underlying learning ability.

414 Practice augments individual performance differences which are associated with relatively  
415 stable factors (e.g., aptitude, genotype, phenotypic, and other psychological traits), a view  
416 held in developmental psychology and behavioural genetics <sup>32,65</sup>. We interpret our finding  
417 as a reflection of interindividual differences in capabilities (rather than actual performance  
418 levels), mediated by the degree of cortical folding <sup>28,29</sup>. Although in prospective cohort  
419 studies, within-person change trajectories generally have lower heritability rates than  
420 cross-sectional measurements obtained from different groups of individuals <sup>66</sup>, the  
421 stimulus for performance change is usually under experimental control in an intervention  
422 study. Intervention studies from behavioural genetics report higher heritability rates with  
423 motor practice <sup>31,32</sup>. In particular, the twin study by Williams & Gross <sup>31</sup> used the same  
424 postural learning task as in the present work (stabilometer task) and found increased  
425 genetic influences on motor performance across six practice sessions. When our  
426 participants learned the same postural task (also across six sessions), the impact of initial  
427 performance differences on subsequent achievements decreased during practice (Fig.  
428 S15). A large portion of this increasing residual variance during practice was explained by  
429 variations in cortical folding of the pre-SMA/SMA. Future studies are required to

430 disentangle the specific contributions of genetic or (early) environmental factors to  
431 behaviourally meaningful variations in cortical folding.

432 A large network of cortical and sub-cortical regions is involved in gait and postural  
433 control<sup>67</sup> and our analyses specifically focused on the cerebral cortical contributions to  
434 individual differences in postural learning. The supplementary motor area is critically  
435 involved in anticipatory postural control and gait<sup>68,69</sup>. This region also adapts its structure  
436 in response to postural training<sup>70</sup>. Practice of the stabilometer task (used in the present  
437 work) induces structural gray matter changes in the left pre-SMA/SMA and  
438 microstructural changes in the underlying white matter tracts of the left centrum semiovale  
439<sup>35</sup>. Practice-induced structural changes were also accompanied by increased functional  
440 connectivity between the pre-SMA/SMA and medial parietal areas<sup>71</sup>. This indicates that  
441 postural learning is associated with the connectivity and folding pattern of the pre-  
442 SMA/SMA embedded within a wider cortical-subcortical network responsible for posture  
443 and gait control.

444 An individual's genotype has a significant impact on practice-induced motor performance  
445 gains<sup>32</sup> as well as on sulcal morphology<sup>39</sup>. To which extent variations in cortical folding  
446 are predictive of learning success in different types of motor tasks remains unclear. The  
447 folding-learning associations observed in our study suggest a comparably homogeneous  
448 effect within some selected anthropometric, demographic, and performance sub-categories  
449 of our sample (Fig. S8). Although the overall pattern of cortical folding is relatively stable  
450 across life, supportive interventions could have a significant impact on motor learning. In  
451 line with this, we found an overlap of meaningful folding variations with practice-induced  
452 plasticity in pre-SMA/SMA which is consistent with research using juggling as long-term  
453 motor learning paradigm<sup>25</sup>. A spatial overlap was found between juggling-induced gray  
454 matter changes in parietal regions and an association between baseline parietal gray matter  
455 volume with subsequent learning-induced performance improvements<sup>25</sup>. Together, this  
456 supports future efforts to mitigate potential behavioural deficits related to cortical  
457 predispositions by using appropriate training methods. Second, additional interventions  
458 such as vigorous physical exercise in the weeks prior to motor practice can further  
459 improve learning in this particular postural task<sup>47</sup>. The beneficial effect of vigorous  
460 exercise on postural learning is mediated by structural and functional changes in the  
461 fronto-parietal brain network<sup>47,72</sup>. Thus, plasticity-inducing intervention strategies may be  
462 a fruitful approach to enhance learning beyond neural predispositions (see Supplementary  
463 text).

464 Cortical folding is the result of different mechanisms extrinsic and intrinsic to the cortical  
465 sheet. Extrinsic sources can be the volumetric constraints of the cranial vault harboring an  
466 expanded cortex or connected axons pulling cortical and sub-cortical regions closer  
467 together to enhance information transmission speed<sup>73</sup>. Intrinsic mechanisms can be a  
468 higher level of cortical neurogenesis, differential tangential expansion of upper cortical  
469 layers or neuropile growth<sup>4,6</sup>. Cross-species comparisons show that humans possess a  
470 remarkably large number of neurons in the cerebral cortex<sup>74</sup>. Studies in ferret, macaque  
471 and human brain found that, in species with a folded cortex, the rate of neurogenesis is  
472 heterogeneous along the developing cortical mantle<sup>4</sup>. Higher rates of neurogenesis  
473 emerging in upper cortical layers of human-specific gene knock-in mice<sup>18</sup> result in  
474 cortical buckling of the otherwise lissencephalic mouse brain and in better spatial learning  
475 capabilities in these animals. In addition, neuropile expansion influences the growth of  
476 late developing cortical regions (e.g. tertiary sulci)<sup>6</sup>. Thus, higher adaptive requirements  
477 of the postural system during development or evolution could have fostered surface  
478 expansion and folding in task-specific cortical regions<sup>1,75-77</sup>. Our study revealed that intra-

479 specific variations in cortical folding and tertiary sulcus morphology predict learning of a  
480 challenging postural task. The results also show that the impact of cortical folding on  
481 learning is related to differences in cortical surface area as well as surface area-  
482 independent extrinsic and/or intrinsic factors of folding, but not to differences in  
483 intracortical microstructure (Fig. 3, 4 and 6). The pattern of correlations in Fig. 3 and 6  
484 indicates that (1) sulcal and gyral surface area exerts both significant positive and negative  
485 influences on learning rate, (2) the significant positive influence of surface area on  
486 learning rate is mediated via its impact on cortical folding and (3) the significant negative  
487 influence of surface area on learning rate likely arises from the gyral regions around the  
488 tertiary paramidline sulci. Further studies with higher-resolution MRI techniques are  
489 required to disentangle the contributions of extrinsic and intrinsic sources of cortical  
490 folding (e.g. U-fibres, layer-specific microstructure) and of gyral, sulcal and fundal  
491 points<sup>78</sup> to behavioural differences.

492 While the underlying factors of cortical folding are subject to intense research in the  
493 biological and physical sciences<sup>79</sup>, our study investigated the behavioural capacities that  
494 are enabled by higher levels of local cortical folding in humans. Cortical folding was  
495 related to learning rates over multiple motor practice sessions. The fact that the learning  
496 rates were adjusted for differences in initial performance (and that cortical folding was  
497 also not related to initial performance differences) has implications for inclusive learning  
498 approaches. Individual learning capabilities, irrespective of initial performance conditions,  
499 may be associated with stable and region-specific morphological characteristics of the  
500 cortex. Under the assumption of physical constraints to the information processing  
501 capacity of the cerebral cortex<sup>9</sup>, education seems critical for an individual to realize its  
502 potential in a particular domain regardless of their initial performance in that domain. Our  
503 study also showed that learning rates mediated between higher cortical folding and  
504 asymptotic levels of performance at the end of a practice period. In that sense, improved  
505 human performance does not necessarily emerge from an extraordinary brain morphology,  
506 but rather from an interaction between fertile learning environments and remarkably high  
507 learning capabilities<sup>29</sup>. In our study with healthy human participants, high learning  
508 capability was partially reflected in the surface morphology of the human neocortex.

## 512 **Methods**

### 514 **Experimental Design**

515 We analyzed MRI and behavioural data from three independent motor learning  
516 experiments involving adult human participants (see Participants). All participants with  
517 complete MRI and behavioural data from these three studies were included in the  
518 analyses. MRI of the brain was performed before motor practice of a challenging new  
519 postural task on a stabilometer (see Postural task practice). Indices of motor performance  
520 and learning rate over several practice sessions (see Analysis of motor learning) were  
521 correlated with local indices of cortical folding from preprocessed MRI data (see MRI  
522 acquisition and MRI preprocessing). Statistical analyses involved vertex-wise  
523 comparisons of cortical curvature and region-of-interest (ROI) comparisons of cortical and  
524 sulcal morphology as well as intracortical microstructure (see Statistical analysis).

### 526 **Participants**

527 A sample of 131 right-handed participants with normal or corrected-to-normal vision  
528 (mean age of 24.6 years, age range of 19-35 years, 57 females, mean body height 174 cm,

body height range 153-191 cm) was included from the datasets of three independent motor learning experiments<sup>35,46-48</sup>. In addition, data from<sup>80</sup> was used to increase the sample size for the analysis of short-term improvements in motor performance (only data for session 1). The studies were performed in accordance with the Declaration of Helsinki and approved by the Ethics Committees of the Universities of Leipzig and Magdeburg (Germany). Exclusion criteria were contraindications to magnetic resonance imaging (MRI), body mass index (BMI) > 30 kg/cm<sup>2</sup>, a history of neuropsychiatric diseases, left-handedness and prior experience with the task to be learnt. Participants were screened for contraindications of MRI before participation. Participants were naive to the experimental setup and postural training procedure and were of comparable educational level (all participants had A-level).

### Postural task practice

Participants learned a challenging whole-body postural task on a stabilometer either on one practice session (N=131) or over six practice sessions (N=84). From the 84 participants, practice sessions were either distributed over six consecutive weeks with one training session per week (N=58, study 1 and study 3) or distributed over four consecutive weeks with 1-2 practice sessions per week (N=26, study 2). The stabilometer is a movable, seesaw-like platform attached to a superimposed pivot with a maximum board deviation of 26° to each tilt side (stability platform, model 16030L, Lafayette Instrument). Participants were instructed to stand on the stabilometer board and hold/restabilize the platform within a tolerance interval of ± 3° from the horizontal (see Supplementary Video files). After each of the 15 trials (30 seconds in each trial) per practice session, participants received verbal performance feedback. Performance was measured as accumulated time (in seconds) participants were able to maintain the platform in the ± 3° tolerance interval (Time-in-balance). A short break of 2 minutes between trials was used to avoid fatigue. Each practice session lasted approx. 45 minutes. To familiarize subjects with the task and to prevent falls, we allowed the use of a supporting hand rail in the first trial of session 1. Familiarization trials were excluded from the analysis. We used a discovery learning approach<sup>81</sup> in which no information about the performance strategy (only the trial-wise quantitative performance feedback) was provided during practice. Therefore, participants had to discover their optimal strategy to improve task performance (e.g. error correction strategy with legs, hip, and arms) based on by trial and error.

### Analysis of motor learning

The mean performance scores (mean of time-in-balance values across 15 trials) on each of the six practice sessions for each individual participant were fitted to a general power function,  $y(x) = a * x^n$ , which describes motor learning over longer timescales well<sup>82</sup>. In this function, the base  $a$  denotes initial task performance,  $x$  is training session (time devoted to practice), and the exponent  $n$  indicates the slope of the function (rate of learning). Furthermore, early learning was calculated from performance data on the first practice session. For that, we subtracted the mean of the first five trials from the mean of the last five trials. We used learning rate ( $n$ ), initial performance ( $a$ ) and early learning (performance gain during session 1) as dependent variables in statistical analyses of brain-behavioural relationships. As expected from motor learning literature<sup>50</sup>, initial performance negatively predicted learning rate (Fig. S1). To get an unbiased readout of learning ability, we adjusted  $n$  for differences in  $a$ <sup>51</sup>.

### Magnetic resonance imaging (MRI) acquisition

Anatomical T1-weighted MPRAGE data<sup>83</sup> were acquired on a 3T MAGNETOM magnetic resonance imaging (MRI) system (Siemens Healthcare) with 176 slices in sagittal orientation (study 1 N=27: Tim Trio system using a 32-channel head coil, study 2 N=26: Prisma system using a 64-channel head coil, study 3 N=31: Prisma system using a 32-channel head coil). The imaging parameters used were as follows. Study 3: inversion time (TI) = 900 ms, repetition time (TR) = 2300 ms, echo time (TE) = 2.98 ms, flip angle = 9°, field-of-view (FOV) = 256 x 240 mm<sup>2</sup>, spatial resolution = 1 x 1 x 1 mm<sup>3</sup>; study 1: (TI) = 650 ms, (TR) = 1300 ms, (TE) = 3.46 ms, flip angle = 10°, (FOV) = 256 x 240 mm<sup>2</sup>, spatial resolution = 1 x 1 x 1 mm<sup>3</sup>; study 2: (TR) = 2600 ms; (TE) = 5.18 ms; flip angle = 7°; (FOV) = 256 x 256 mm<sup>2</sup>; spatial resolution = 0.8 x 0.8 x 0.8 mm<sup>3</sup>. Due to the potential influence of the radiofrequency head coil on brain morphometric indices<sup>84</sup> we corrected for this factor in the statistical models. In addition, we corrected for MRI scanner and MPRAGE sequence-specific effects using a separate nuisance covariate for each of the three studies.

### **MRI preprocessing**

MR images of all participants passed both the visual quality inspection and the CAT12 data quality checks. All scans from 131 participants reached a weighted average image quality rating (IQR) of 86.79% (range 80.64%–89.87%) corresponding to a quality grade B while the long-term practice cohort (N=84) reached a weighted average (IQR) of 87.32% (quality grade B; range 85.62%–89.87%). T1-weighted images were preprocessed using the CAT12 toolbox, v12.7 r1738 (Christian Gaser, Structural Brain Mapping Group, Jena University Hospital; <http://www.neuro.uni-jena.de/cat12/>,<sup>85</sup>) within SPM12 v7771 (Statistical Parametric Mapping, Wellcome Trust Centre for Neuroimaging; <http://www.fil.ion.ucl.ac.uk/spm/software/spm12/>) for Matlab R2017b (The MathWorks, Inc.). This image analysis pipeline allows for the computation of surface-based parameters based on, e.g., the mean curvature and procedures are described in detail on the CAT 12 website and manual (<https://neuro-jena.github.io/cat/index.html#DOWNLOAD>). All procedures followed the recommendations in the CAT 12 manual. Briefly, initial voxel-based processing involves spatially adaptive denoising, resampling, bias correction, affine registration and unified segmentation and provides starting estimates for subsequently refined image processing. Output images were then skull-stripped, parcellated into left and right hemisphere, cerebellum and subcortical areas as well as corrected for local intensity differences and adaptively segmented followed by spatial normalization. Subsequently, central cortical surfaces were reconstructed and topological defects were repaired using spherical harmonics. The refined central surface mesh provided the basis for extraction of local cortical folding metrics (e.g., local curvature) and resulting local values were projected onto each mesh node. Local gyrification<sup>52</sup> is revealed through estimations of “smoothed absolute mean curvature” based on averaging curvature values from each vertex of the surface mesh. Mean curvature is an extrinsic surface measure and represents change in direction of surface normals along the surface (normal are vectors pointing outwards perpendicular to the surface). Large negative values correspond to sulci and large positive values to gyri. The resulting values were averaged within a distance of 3 mm and converted to absolute values (both sulcal and gyral regions have positive values, see<sup>52</sup>). We then applied a surface-based heat kernel filter with FWHM = 20 mm, as recommended for vertex-wise gyrification in the CAT12 user manual. The resulting values give information about the local amount of gyrification. Finally, individual central surfaces were registered to the Freesurfer “FsAverage” template using spherical mapping with minimal distortions. Local gyrification values are transferred onto this FsAverage template.



628 To assess local interactions of cortical folding, surface area and cortical thickness in the  
629 left caudal superior frontal gyrus and to manually define and label sulci in individual  
630 subjects native space, we additionally used FreeSurfer automated segmentation tools<sup>86,87</sup>  
631 (FreeSurfer 6) to reconstruct cortical surfaces (recon-all command;  
632 <https://freesurfer.net/fswiki/recon-all>) from all baseline T1-weighted MRI images of the  
633 long-term practice cohort (N=84). Cortical reconstruction and volumetric segmentation  
634 were performed with the FreeSurfer image analysis suite, which is documented and freely  
635 available for download online (<http://surfer.nmr.mgh.harvard.edu/>). The technical details  
636 of these procedures are described on the FreeSurfer website  
637 (<https://surfer.nmr.mgh.harvard.edu/fswiki/FreeSurferMethodsCitation>). Briefly, this  
638 processing includes motion correction of volumetric T1 weighted images, removal of non-  
639 brain tissue using a hybrid watershed/surface deformation procedure, automated Talairach  
640 transformation, segmentation of the subcortical white matter and deep gray matter  
641 volumetric structures (including hippocampus, amygdala, caudate, putamen, ventricles)  
642 intensity normalization, tessellation of the grey matter white matter boundary, automated  
643 topology correction, and surface deformation following intensity gradients to optimally  
644 place the grey/white and grey/cerebrospinal fluid borders at the location where the greatest  
645 shift in intensity defines the transition to the other tissue class. Once the cortical models  
646 are complete, a number of deformable procedures can be performed for further data  
647 processing and analysis including surface inflation, registration to a spherical atlas which  
648 is based on individual cortical folding patterns to match cortical geometry across subjects,  
649 parcellation of the cerebral cortex into units with respect to gyral and sulcal structure, and  
650 creation of a variety of surface-based data including maps of curvature and surface area.  
651 This method uses both intensity and continuity information from the entire three-  
652 dimensional MR volume in segmentation and deformation procedures to produce  
653 representations of cortical thickness, calculated as the closest distance from the grey/white  
654 boundary to the grey/CSF boundary at each vertex on the tessellated surface. The maps are  
655 created using spatial intensity gradients across tissue classes and are therefore not simply  
656 reliant on absolute signal intensity. The maps produced are not restricted to the voxel  
657 resolution of the original data thus are capable of detecting submillimeter differences  
658 between groups. Procedures for the measurement of cortical thickness have been validated  
659 against histological analysis and manual measurements. We supplemented the analysis of  
660 local cortical geometry (curvature) with an analysis of a gyrification metric that depends  
661 on the ratio between the outer hull surface area and the local cortical surface area (called  
662 outer-surface-based gyrification indices). Therefore, we computed the local gyrification  
663 index<sup>40</sup> of freesurfer cortical reconstructions.  
664 Based on the group-level result of a correlation between motor learning ability and local  
665 cortical curvature in the left pre-SMA/SMA (Fig. 2A), we manually defined a region-of-  
666 interest (ROI) in the left caudal SFG (including pre-SMA/SMA) encompassing the cortex  
667 in SFG extending from the anterior edge of the superior precentral sulcus (joining the  
668 medial precentral sulcus) to the caudal part of the superior frontal sulcus (at the level of  
669 the gyral bridge between middle and superior frontal gyrus) and, in the medio-lateral  
670 dimension, the cortex running from the interhemispheric fissure to the superior frontal  
671 sulcus<sup>58</sup> on the FreeSurfer “FsAverage” template brain. This ROI was projected to each  
672 participant’s native space and local indices of cortical folding<sup>88</sup>, cortical surface area and  
673 cortical thickness were extracted from the white matter surface (to avoid blood vessel  
674 contamination<sup>8</sup>) and averaged in this ROI. In addition to that, we manually defined the  
675 sulcal landscape in the left caudal SFG using the freeview tool in FreeSurfer and the  
676 labeling methodology of<sup>58</sup>. The following sulci were investigated: the superior precentral  
677 sulcus (SP), the superior frontal sulcus (SF), the central sulcus (CS), the medial precentral

678 sulcus (MeP), the marginal precentral sulcus (MaP) and the paramidline sulci (PaM).  
679 Based on<sup>58</sup>, we first drew the sulcal lines on the inflated cortical surfaces and validated  
680 the position and shape of each sulcus using the corresponding pial surface image<sup>8</sup>. Thus,  
681 information from the inflated and pial surfaces informed our labeling and allowed us to  
682 form a consensus across surfaces and clearly determine each sulcal boundary. Although  
683 our analysis focused on PaM, we manually identified all sulci in the caudal and superior  
684 part of the lateral frontal cortex (in total 458 sulci in left hemispheres; labeled sulci from  
685 each individual are depicted in Figs. S12-S14) to ensure the most accurate definition of  
686 PaM components<sup>13,58,89</sup>.

687 The superior frontal gyrus of the human brain typically contains three PaM components  
688 (anterior, intermediate and posterior component) that are arranged in parallel or  
689 orthogonal to and in-between the interhemispheric fissure and the superior frontal sulcus  
690<sup>13,58,89</sup>. We focused our analysis on the posterior and intermediate PaM components that  
691 are located in close spatial relationship to the pre-SMA/SMA. PaM sulci were located on  
692 the lateral surface of the left hemisphere, medial to SF, anterior to SP and MeP. We  
693 labeled PaM sulci which overlap with the cluster found in the group-level analysis (Fig. 2;  
694 group-level cluster was projected to individual surfaces).

695 Next, we quantified the surface area and folding index of each labeled PaM sulcus using  
696 `mris_anatomical_stats` function included in FreeSurfer. In case of more than one identified  
697 PaM sulcus per hemisphere, we added surface area and folding values.

### 698 **Statistical analysis**

699 Our main goals were to test for positive relationships between inter-individual differences  
700 in learning rate or motor performance with local cortical folding. In these analyses, we  
701 corrected for the influence of age, gender, body size, total intracranial volume (estimated  
702 using CAT12 module “Estimating TIV”) and study (initial differences in  $a$  were only  
703 adjusted in the analysis of learning rate).

### 704 *Motor behaviour*

705 Short-term changes in motor performance (time-in-balance in seconds) in the first practice  
706 session ( $N=131$ ) were analyzed with repeated measures analysis of variance (RM-  
707 ANOVA) with within-subject factor TRIAL (15 levels) in SPSS (IBM SPSS Statistics,  
708 Version 28.0.1.0, Armonk, NY). Long-term changes in motor performance across the six  
709 practice sessions were analyzed with RM-ANOVA of the session mean values (mean of  
710 15 trials per session) with within-subject factor SESSION (6 levels). Trial-to-trial  
711 variation in performance were calculated with the coefficient-of-variation (COV, standard  
712 deviation divided by the mean) for each session and subjected to RM-ANOVA with factor  
713 SESSION (6 levels). Session-specific inter-individual variation was quantified using  
714 interquartile range between the upper and lower 25% of mean performance values.  
715 Pearson correlations were used to relate mean performance values across sessions.

### 716 *Analysis of cortical folding on long-term learning, initial performance and short-term adaptation*

717 Our main predictions were tested with a multiple linear regression model in SPM12  
718 (<http://www.fil.ion.ucl.ac.uk/spm/software/spm12/>) with local cortical folding values  
719 across the cortex as dependent variable and learning rate  $n$  ( $N=84$ , corrected for individual  
720 differences in initial performance level  $a$ ) or initial performance  $a$  as well as short-term  
721 adaptation ( $N=84$  and  $N=131$ ) as predictors. In each analysis, we corrected for the  
722 influence of age<sup>90</sup>, gender<sup>91</sup>, body height<sup>46</sup>, head coil<sup>84</sup>, total intracranial volume<sup>92</sup> and  
723 training study<sup>35,47,48</sup>. Covariation between (nuisance) variables are shown in Fig. S2.

728 Statistical inference of positive relationships between behavioural parameters and cortical  
729 curvature was performed across the whole cortex (exploratory analysis) with non-  
730 parametric permutation test (vertex-level T-statistics) and 5000 permutations.  $p$ -values  
731 were considered significant at an FWE corrected threshold of  $p < 0.05$ . Technical  
732 reproduction of significant effects was performed using a further MRI scan from the same  
733 participants. This further MRI scan was obtained after the last motor practice session  
734 either six weeks (study 1 and study 3) or four weeks (study 2) after the baseline MRI scan.  
735 The cluster extent from the initial exploratory whole-cortex analysis (Fig. 2A) was used as  
736 inclusive mask and surface measures from the second time point were averaged in this  
737 respective mask. Cortical folding values in this mask were highly reliable across the two  
738 MRI time points ( $r = 0.964$ ). The overlap between cortical folding and practice-induced  
739 plasticity in grey matter volume was calculated using a group-space mask of the cluster in  
740 pre-SMA/SMA where we previously identified grey matter changes across the six-week  
741 practice period<sup>35</sup> (xyz MNI coordinate -12, 13, 64, cluster with highest Z-value=4.35  
742 across the whole brain). The voxel-space cluster (rendered brain see Fig. 2) was projected  
743 to the FsAverage surface template using CAT12 surface tools. The cortical folding values  
744 in this mask as well as in the mask for technical replication were averaged and subjected  
745 to statistical analysis in SPSS. In subsequent correlation analyses, we used residualized  
746 learning rate and cortical curvature values (corrected for age, gender, initial performance,  
747 body height, head coil, TIV, training study) to determine reproducibility, effect sizes and  
748 coincidence of folding and plasticity (Figs. 2, 5 and S6). Variations of the effect were  
749 tested with Pearson correlation analyses of the positive relationship between learning rate  
750 and cortical folding in pre-SMA/SMA (time point 1) in differently categorized sub-groups  
751 of the original sample (N=84, Fig. S8). We categorized this sample with respect to the  
752 following demographic, anthropometric, sub-group-related, activity-related and  
753 performance-related variables by means of binarized dummy variables or median split:  
754 age, gender, body height, initial performance level, physical activity level (above or below  
755 4 hours per week), vigorous physical exercise in 2 weeks prior to motor practice, study-  
756 specific sub-groups. For each correlation of the categorized groups, we used residualized  
757 learning rate and cortical folding variables with the categorization variable not included in  
758 the residualization procedure.

759 In addition to the main cohort (N=84) we included additional 47 participants from<sup>46</sup> in the  
760 correlation of initial performance and short-term adaptation with cortical folding. These  
761 additional participants were measured on a Tim Trio MRI system using either 12-channel  
762 or 32-channel head coil (which was corrected for in the respective statistical model, for  
763 more details see<sup>46</sup>). Dependent variables were either initial performance (mean  
764 performance of 15 trials in practice session 1) or early learning calculated as the difference  
765 between the mean of the last 5 trials and the mean of the first 5 trails from practice session  
766 one.

767  
768 *Myelin-sensitive magnetization transfer saturation (MT) and estimates of neurite density*  
769 *index (NDI) from neurite-orientation-and-dispersion-imaging (NODDI) modeling of*  
770 *diffusion MRI*

771 Myelin-sensitive MT values were calculated from multiparametric quantitative MRI  
772 protocol with 0.8 mm isotropic voxel size<sup>48</sup> and NDI values were calculated from NODDI  
773 modeling of diffusion MRI data with 1.6 mm resolution<sup>93</sup> within the gray matter in the  
774 study2-subsample (N=26). Both MT and NODDI metrics are highly reliable<sup>48,93</sup> and  
775 calculation of NDI values within gray matter was adjusted according to<sup>94</sup>. Based on  
776 previous findings<sup>1</sup>, MT values were extracted and averaged within three cortical depth-  
777 dependent tissue compartments (superficial and deep cortical gray matter [GM] and

cortex-adjacent white matter) in individual space using CAT12 surface tools. For each compartment, a mean sampling function (average along surface normal) and a equi-distance mapping model with 7 steps was employed (startpoint: superficial=-0.5, deep=0, white matter=0.5; endpoint: superficial=0, deep=0.5, white matter=1.0). Superficial GM extends from the gray matter/CSF border to the central surface. Deep GM extends from the central surface to the gray/white matter border and the cortex-adjacent white matter extends from the gray/white matter border into the cortex-adjacent white matter. Due to lower resolution of diffusion data, NDI values were sampled from the whole GM compartment (startpoint=-0.5, endpoint=0.5). Resulting MT maps and NDI maps were resampled into template space and smoothed with filter size of 15 mm FWHM. To visualize MT/NDI distribution across the whole cortex (Fig. 4A,B), we additionally mapped and averaged MT values in the whole gray matter compartment (from gray matter/CSF to gray/white matter boundary). For statistical analysis, compartment-specific values were extracted from the region overlapping with the pre-SMA/SMA cluster (Fig. 2A), but also analyzed vertex-wise. We used residualized (corrected for age, gender, body height, TIV, initial performance) MT/NDI, learning rate, cortical folding and age parameters for all Pearson and partial correlation analyses or adjusted for these nuisance variables in SPM statistical models for vertex-wise analyses (except of the age by MT/NDI correlation in which we did not correct for age and initial performance).

### *Structural equation modeling (SEM)*

SEM was used to better understand the dependencies between motor behaviour and cortical folding (Figs. 2 and 5) as well as between cortex morphology variables (Fig. 3 and 6). For this purpose, we used the lavaan package<sup>95</sup> running in R (i386 4.1.1, R Core Team, 2020) and RStudio. In the first model (Fig. 2D), cortical folding in the pre-SMA/SMA and residualized learning rate  $n$  were used as exogenous variables to predict final performance in practice session 6 (SEM fit indices  $RMSEA = 0.000$ ,  $SRMR = 0.000$ ,  $CFI = 1.000$ ,  $TLI = 1.000$ ). Note that values of cortical folding and final performance were not adjust for differences in initial performance in this analysis. In the second model (SEM fit indices  $RMSEA = 0.000$ ,  $SRMR = 0.000$ ,  $CFI = 1.000$ ,  $TLI = 1.000$ , Fig. 5) we used the independent ROI in which practice-induced gray matter changes were found previously<sup>35</sup> (Fig. 2G-I). In the third model (Fig. 3, SEM fit indices  $RMSEA = 0.000$ ,  $SRMR = 0.000$ ,  $CFI = 1.000$ ,  $TLI = 1.000$ ), surface area, cortical thickness and cortical folding indices in the left caudal SFG were used as exogenous variables to predict learning rate  $n$ . In the fourth model (Fig. 6, SEM fit indices  $RMSEA = 0.000$ ,  $SRMR = 0.019$ ,  $CFI = 1.000$ ,  $TLI = 1.025$ ), the number of PaM sulci, PaM surface area and PaM folding index were used as exogenous variables to predict learning rate  $n$ . All values were residualized for age, gender, body height, TIV, initial performance and training study with the exception that values of cortical folding and final performance in the first two models were not adjust for differences in initial performance. We calculated direct and indirect effects with 95% bootstrapped CIs using 5000 permutations.

## **Acknowledgments**

### **Funding:**

German Research Foundation grant SFB 1436/C01 (MT)

German Research Foundation grant SFB 1436/C01 (GZ)

### **Author contributions:**

828                    Conceptualization: MT, NL  
829                    Methodology: MT, GZ  
830                    Investigation and formal analysis: MT  
831                    Visualization: MT  
832                    Data curation: MT  
833                    Writing—original draft: MT  
834                    Writing—review & editing: MT, GZ, NL  
835

836                    **Competing interests:** Authors declare that they have no competing interests.  
837

838                    **Data availability:** All data are available in the main text or the supplementary materials.  
839                    In addition, data and code used for this project have been made freely available under  
840                    <https://doi.org/10.24352/UB.OVGU-2023-095>. Visualizations of all sulcal definitions  
841                    generated for each participant are provided in the Supplementary Materials. Requests for  
842                    further information or raw data should be directed to the corresponding author, M.T.  
843                    ([marco.taubert@ovgu.de](mailto:marco.taubert@ovgu.de)).  
844

845

## 846 References

- 847 1. Grasby, K. L. *et al.* The genetic architecture of the human cerebral cortex. *Science* **367**; 10.1126/science.aay6690  
848 (2020).
- 849 2. Fornito, A. Individual Differences in Anterior Cingulate/Paracingulate Morphology Are Related to Executive  
850 Functions in Healthy Males. *Cerebral Cortex* **14**, 424–431; 10.1093/cercor/bhh004 (2004).
- 851 3. Hopkins, W. D., Cantalupo, C. & Tagliabata, J. Handedness Is Associated with Asymmetries in Gyrification of  
852 the Cerebral Cortex of Chimpanzees. *Cerebral Cortex* **17**, 1750–1756; 10.1093/cercor/bhl085 (2007).
- 853 4. Llinares-Benadero, C. & Borrell, V. Deconstructing cortical folding: genetic, cellular and mechanical  
854 determinants. *Nat Rev Neurosci* **20**, 161–176; 10.1038/s41583-018-0112-2 (2019).
- 855 5. Miller, J. A. & Weiner, K. S. Unfolding the evolution of human cognition. *Trends in Cognitive Sciences* **26**, 735–  
856 737; 10.1016/j.tics.2022.06.008 (2022).
- 857 6. Rash, B. G., Arellano, J. I., Duque, A. & Rakic, P. Role of intracortical neuropil growth in the gyrification of the  
858 primate cerebral cortex. *Proc. Natl. Acad. Sci. U.S.A.* **120**; 10.1073/pnas.2210967120 (2023).
- 859 7. Amiez, C. *et al.* Sulcal organization in the medial frontal cortex provides insights into primate brain evolution.  
860 *Nat Commun* **10**; 10.1038/s41467-019-11347-x (2019).
- 861 8. Willbrand, E. H., Voorhies, W. I., Yao, J. K., Weiner, K. S. & Bunge, S. A. Presence or absence of a prefrontal  
862 sulcus is linked to reasoning performance during child development. *Brain Struct Funct* **227**, 2543–2551;  
863 10.1007/s00429-022-02539-1 (2022).
- 864 9. Hofman, M. A. Evolution of the human brain: when bigger is better. *Front. Neuroanat.* **8**;  
865 10.3389/fnana.2014.00015 (2014).
- 866 10. Zilles, K., Palomero-Gallagher, N. & Amunts, K. Development of cortical folding during evolution and  
867 ontogeny. *Trends in Neurosciences* **36**, 275–284; 10.1016/j.tins.2013.01.006 (2013).
- 868 11. ROTH, G. & DICKE, U. Evolution of the brain and intelligence. *Trends in Cognitive Sciences* **9**, 250–257;  
869 10.1016/j.tics.2005.03.005 (2005).
- 870 12. Stout, D. & Hecht, E. E. Evolutionary neuroscience of cumulative culture. *Proc. Natl. Acad. Sci. U.S.A.* **114**,  
871 7861–7868; 10.1073/pnas.1620738114 (2017).
- 872 13. Eberstaller, O. Das Stirnhirn. Ein Beitrag zur Anatomie der Oberfläche des Grosshirns. *The American Journal of*  
873 *Psychology* **3**, 371; 10.2307/1411701 (1890).
- 874 14. Spitzka, E. A. A Study of the Brains of Six Eminent Scientists and Scholars Belonging to the American  
875 Anthropometric Society, together with a Description of the Skull of Professor E. D. Cope. *Transactions of the*  
876 *American Philosophical Society* **21**, 175; 10.2307/1005434 (1907).
- 877 15. Connolly, C. J. *External morphology of the primate brain* (Charles C Thomas Publisher, Springfield, 1950).
- 878 16. Bittner, N. *et al.* Combining lifestyle risks to disentangle brain structure and functional connectivity differences  
879 in older adults. *Nat Commun* **10**; 10.1038/s41467-019-08500-x (2019).
- 880 17. Ponce de León, M. S. *et al.* The primitive brain of early Homo. *Science* **372**, 165–171; 10.1126/science.aaz0032  
881 (2021).
- 882 18. Zhao, J., Feng, C., Wang, W., Su, L. & Jiao, J. Human SERPINA3 induces neocortical folding and improves  
883 cognitive ability in mice. *Cell Discov* **8**; 10.1038/s41421-022-00469-0 (2022).
- 884 19. Gregory, M. D. *et al.* Regional Variations in Brain Gyrification Are Associated with General Cognitive Ability in  
885 Humans. *Current Biology* **26**, 1301–1305; 10.1016/j.cub.2016.03.021 (2016).
- 886 20. Falk, D., Lepore, F. E. & Noe, A. The cerebral cortex of Albert Einstein: a description and preliminary analysis  
887 of unpublished photographs. *Brain* **136**, 1304–1327; 10.1093/brain/aws295 (2013).
- 888 21. Del-Valle-Anton, L. & Borrell, V. Folding brains: from development to disease modeling. *Physiological Reviews*  
889 **102**, 511–550; 10.1152/physrev.00016.2021 (2022).
- 890 22. Kanai, R. & Rees, G. The structural basis of inter-individual differences in human behaviour and cognition. *Nat*  
891 *Rev Neurosci* **12**, 231–242; 10.1038/nrn3000 (2011).

- 892 23. Boekel, W. *et al.* A purely confirmatory replication study of structural brain-behavior correlations. *Cortex* **66**,  
893 115–133; 10.1016/j.cortex.2014.11.019 (2015).
- 894 24. Mathias, S. R. *et al.* Minimal Relationship between Local Gyrfication and General Cognitive Ability in Humans.  
895 *Cerebral Cortex* **30**, 3439–3450; 10.1093/cercor/bhz319 (2020).
- 896 25. Sampaio-Baptista, C. *et al.* Gray matter volume is associated with rate of subsequent skill learning after a long  
897 term training intervention. *NeuroImage* **96**, 158–166; 10.1016/j.neuroimage.2014.03.056 (2014).
- 898 26. Henrich, J. P. *The secret of our success. How culture is driving human evolution, domesticating our species, and*  
899 *making us smarter* (Princeton University Press, Princeton, 2016).
- 900 27. Dehaene, S. *How we learn. Why brains learn better than any machine ... for now* (Viking, [New York, New  
901 York], 2020).
- 902 28. Allman, J. M. *Evolving brains*. 1st ed. (Scientific American Library; Distributed by W.H. Freeman, New York,  
903 2000).
- 904 29. Kaas, J. H. & Herculano-Houzel, S. (eds.). *Evolution of nervous systems. A comprehensive reference*. 2nd ed.  
905 (Elsevier, Amsterdam [u.a.], 2017).
- 906 30. Draganski, B. *et al.* Changes in grey matter induced by training. *Nature* **427**, 311–312; 10.1038/427311a (2004).
- 907 31. Williams, L. R. T. & Gross, J. B. Heritability of Motor Skill. *Acta genet. med. gemellol.: twin res.* **29**, 127–136;  
908 10.1017/S000156600008606 (1980).
- 909 32. Fox, P. W., Hershberger, S. L. & Bouchard, T. J. Genetic and environmental contributions to the acquisition of a  
910 motor skill. *Nature* **384**, 356–358; 10.1038/384356a0 (1996).
- 911 33. Wenger, E., Brozzoli, C., Lindenberger, U. & Lövdén, M. Expansion and Renormalization of Human Brain  
912 Structure During Skill Acquisition. *Trends in Cognitive Sciences* **21**, 930–939; 10.1016/j.tics.2017.09.008  
913 (2017).
- 914 34. Zatorre, R. J., Fields, R. D. & Johansen-Berg, H. Plasticity in gray and white: neuroimaging changes in brain  
915 structure during learning. *Nat Neurosci* **15**, 528–536; 10.1038/nn.3045 (2012).
- 916 35. Taubert, M. *et al.* Dynamic Properties of Human Brain Structure: Learning-Related Changes in Cortical Areas  
917 and Associated Fiber Connections. *J. Neurosci.* **30**, 11670–11677; 10.1523/JNEUROSCI.2567-10.2010 (2010).
- 918 36. Pang, J. C. *et al.* Geometric constraints on human brain function. *Nature*; 10.1038/s41586-023-06098-1 (2023).
- 919 37. Luders, E. *et al.* Mapping the Relationship between Cortical Convolution and Intelligence: Effects of Gender.  
920 *Cerebral Cortex* **18**, 2019–2026; 10.1093/cercor/bhm227 (2008).
- 921 38. Schmitt, S. *et al.* Associations of gestational age with gyrfication and neurocognition in healthy adults. *Eur Arch*  
922 *Psychiatry Clin Neurosci*; 10.1007/s00406-022-01454-0 (2022).
- 923 39. Schmitt, J. E., Raznahan, A., Liu, S. & Neale, M. C. The Heritability of Cortical Folding: Evidence from the  
924 Human Connectome Project. *Cerebral cortex (New York, N.Y. : 1991)* **31**, 702–715; 10.1093/cercor/bhaa254  
925 (2021).
- 926 40. Schaer, M. *et al.* A surface-based approach to quantify local cortical gyrfication. *IEEE transactions on medical*  
927 *imaging* **27**, 161–170; 10.1109/TMI.2007.903576 (2008).
- 928 41. Voorhies, W. I., Miller, J. A., Yao, J. K., Bunge, S. A. & Weiner, K. S. Cognitive insights from tertiary sulci in  
929 prefrontal cortex. *Nat Commun* **12**; 10.1038/s41467-021-25162-w (2021).
- 930 42. Yao, J. K., Voorhies, W. I., Miller, J. A., Bunge, S. A. & Weiner, K. S. Sulcal depth in prefrontal cortex: a novel  
931 predictor of working memory performance. *Cerebral cortex (New York, N.Y. : 1991)* **33**, 1799–1813;  
932 10.1093/cercor/bhac173 (2023).
- 933 43. Parker, B. J. *et al.* Hominoid-specific sulcal variability is related to face perception ability. *Brain Struct Funct*  
934 **228**, 677–685; 10.1007/s00429-023-02611-4 (2023).
- 935 44. Willbrand, E. H., Ferrer, E., Bunge, S. A. & Weiner, K. S. Development of Human Lateral Prefrontal Sulcal  
936 Morphology and Its Relation to Reasoning Performance. *J. Neurosci.* **43**, 2552–2567;  
937 10.1523/JNEUROSCI.1745-22.2023 (2023).
- 938 45. Anderson, D. I., Lohse, K. R., Lopes, T. C. V. & Williams, A. M. Individual differences in motor skill learning:  
939 Past, present and future. *Human Movement Science* **78**, 102818; 10.1016/j.humov.2021.102818 (2021).

- 940 46. Lehmann, N. *et al.* Interindividual differences in gray and white matter properties are associated with early  
941 complex motor skill acquisition. *Hum Brain Mapp* **40**, 4316–4330; 10.1002/hbm.24704 (2019).
- 942 47. Lehmann, N., Villringer, A. & Taubert, M. Colocalized White Matter Plasticity and Increased Cerebral Blood  
943 Flow Mediate the Beneficial Effect of Cardiovascular Exercise on Long-Term Motor Learning. *J. Neurosci.* **40**,  
944 2416–2429; 10.1523/JNEUROSCI.2310-19.2020 (2020).
- 945 48. Aye, N. *et al.* Test-retest reliability of multi-parametric maps (MPM) of brain microstructure. *NeuroImage* **256**,  
946 119249; 10.1016/j.neuroimage.2022.119249 (2022).
- 947 49. Davlin, C. D. Dynamic Balance in High Level Athletes. *Percept Mot Skills* **98**, 1171–1176;  
948 10.2466/pms.98.3c.1171-1176 (2004).
- 949 50. Adams, J. A. Historical review and appraisal of research on the learning, retention, and transfer of human motor  
950 skills. *Psychological Bulletin* **101**, 41–74; 10.1037/0033-2909.101.1.41 (1987).
- 951 51. Manning, W. H. & Dubois, P. H. Correlational Methods in Research on Human Learning. *Percept Mot Skills* **15**,  
952 287–321; 10.2466/pms.1962.15.2.287 (1962).
- 953 52. Luders, E. *et al.* A curvature-based approach to estimate local gyrification on the cortical surface. *NeuroImage*  
954 **29**, 1224–1230; 10.1016/j.neuroimage.2005.08.049 (2006).
- 955 53. Mota, B. & Herculano-Houzel, S. Cortical folding scales universally with surface area and thickness, not number  
956 of neurons. *Science* **349**, 74–77; 10.1126/science.aaa9101 (2015).
- 957 54. Herculano-Houzel, S. *et al.* The elephant brain in numbers. *Front. Neuroanat.* **8**; 10.3389/fnana.2014.00046  
958 (2014).
- 959 55. Borrell, V. How Cells Fold the Cerebral Cortex. *J. Neurosci.* **38**, 776–783; 10.1523/JNEUROSCI.1106-17.2017  
960 (2018).
- 961 56. Whitaker, K. J. *et al.* Adolescence is associated with genomically patterned consolidation of the hubs of the  
962 human brain connectome. *Proc. Natl. Acad. Sci. U.S.A.* **113**, 9105–9110; 10.1073/pnas.1601745113 (2016).
- 963 57. Ziegler, G. *et al.* Compulsivity and impulsivity traits linked to attenuated developmental frontostriatal  
964 myelination trajectories. *Nat Neurosci* **22**, 992–999; 10.1038/s41593-019-0394-3 (2019).
- 965 58. Germann, J., Robbins, S., Halsband, U. & Petrides, M. Precentral sulcal complex of the human brain:  
966 Morphology and statistical probability maps. *J. Comp. Neurol.* **493**, 334–356; 10.1002/cne.20820 (2005).
- 967 59. Fernández, V., Llinares-Benadero, C. & Borrell, V. Cerebral cortex expansion and folding: what have we  
968 learned? *EMBO J* **35**, 1021–1044; 10.15252/embj.201593701 (2016).
- 969 60. Gautam, P., Anstey, K. J., Wen, W., Sachdev, P. S. & Cherbuin, N. Cortical gyrification and its relationships  
970 with cortical volume, cortical thickness, and cognitive performance in healthy mid-life adults. *Behavioural Brain*  
971 *Research* **287**, 331–339; 10.1016/j.bbr.2015.03.018 (2015).
- 972 61. Green, S. *et al.* Parieto-frontal gyrification and working memory in healthy adults. *Brain Imaging and Behavior*  
973 **12**, 303–308; 10.1007/s11682-017-9696-9 (2018).
- 974 62. Tadayon, E., Pascual-Leone, A. & Santarnecchi, E. Differential Contribution of Cortical Thickness, Surface  
975 Area, and Gyrification to Fluid and Crystallized Intelligence. *Cerebral Cortex* **30**, 215–225;  
976 10.1093/cercor/bhz082 (2020).
- 977 63. Cachia, A. *et al.* Towards Deciphering the Fetal Foundation of Normal Cognition and Cognitive Symptoms From  
978 Sulcation of the Cortex. *Front. Neuroanat.* **15**; 10.3389/fnana.2021.712862 (2021).
- 979 64. Ranganathan, R., Cone, S. & Fox, B. Predicting individual differences in motor learning: A critical review.  
980 *Neuroscience and biobehavioral reviews* **141**, 104852; 10.1016/j.neubiorev.2022.104852 (2022).
- 981 65. Lindenberger, U. & Bakes, P. B. Testing-the-Limits and Experimental Simulation: Two Methods to Explicate the  
982 Role of Learning in Development. *Human Development* **38**, 349–360; 10.1159/000278341 (1995).
- 983 66. Kievit, R. A., Logan, J. A. & Hart, S. A. From the trajectory of heritability to the heritability of trajectories.  
984 *Behav Brain Sci* **45**; 10.1017/S0140525X21001643 (2022).
- 985 67. Snijders, A. H. *et al.* Physiology of freezing of gait. *Annals of neurology* **80**, 644–659; 10.1002/ana.24778  
986 (2016).
- 987 68. Zwergal, A. *et al.* Aging of human supraspinal locomotor and postural control in fMRI. *Neurobiology of Aging*  
988 **33**, 1073–1084; 10.1016/j.neurobiolaging.2010.09.022 (2012).



- 989 69. Richard, A. *et al.* Contribution of the supplementary motor area and the cerebellum to the anticipatory postural  
990 adjustments and execution phases of human gait initiation. *Neuroscience* **358**, 181–189;  
991 10.1016/j.neuroscience.2017.06.047 (2017).
- 992 70. Burciu, R. G. *et al.* Brain Changes Associated with Postural Training in Patients with Cerebellar Degeneration: A  
993 Voxel-Based Morphometry Study. *J. Neurosci.* **33**, 4594–4604; 10.1523/JNEUROSCI.3381-12.2013 (2013).
- 994 71. Taubert, M., Lohmann, G., Margulies, D. S., Villringer, A. & Ragert, P. Long-term effects of motor training on  
995 resting-state networks and underlying brain structure. *NeuroImage* **57**, 1492–1498;  
996 10.1016/j.neuroimage.2011.05.078 (2011).
- 997 72. Lehmann, N., Villringer, A. & Taubert, M. Priming cardiovascular exercise improves complex motor skill  
998 learning by affecting the trajectory of learning-related brain plasticity. *Sci Rep* **12**; 10.1038/s41598-022-05145-7  
999 (2022).
- 1000 73. van Essen, D. C. A tension-based theory of morphogenesis and compact wiring in the central nervous system.  
1001 *Nature* **385**, 313–318; 10.1038/385313a0 (1997).
- 1002 74. Herculano-Houzel, S. Brains matter, bodies maybe not: the case for examining neuron numbers irrespective of  
1003 body size. *Annals of the New York Academy of Sciences* **1225**, 191–199; 10.1111/j.1749-6632.2011.05976.x  
1004 (2011).
- 1005 75. Sun, B. B. *et al.* Genetic map of regional sulcal morphology in the human brain from UK biobank data. *Nat*  
1006 *Commun* **13**; 10.1038/s41467-022-33829-1 (2022).
- 1007 76. Vinton, A. C., Gascoigne, S. J., Sepil, I. & Salguero-Gómez, R. Plasticity’s role in adaptive evolution depends on  
1008 environmental change components. *Trends in Ecology & Evolution* **37**, 1067–1078; 10.1016/j.tree.2022.08.008  
1009 (2022).
- 1010 77. Baldwin, J. M. A New Factor in Evolution. *The American Naturalist* **30**, 441–451; 10.1086/276408 (1896).
- 1011 78. Weiner, K. S. The hypothesis of fundal cognition. *Nat Rev Neurosci*; 10.1038/s41583-023-00725-6 (2023).
- 1012 79. Tallinen, T. *et al.* On the growth and form of cortical convolutions. *Nature Phys* **12**, 588–593;  
1013 10.1038/nphys3632 (2016).
- 1014 80. Taubert, M., Mehnert, J., Pleger, B. & Villringer, A. Rapid and specific gray matter changes in M1 induced by  
1015 balance training. *NeuroImage* **133**, 399–407; 10.1016/j.neuroimage.2016.03.017 (2016).
- 1016 81. Orrell, A. J., Eves, F. F. & Masters, R. Implicit motor learning of a balancing task. *Gait & Posture* **23**, 9–16;  
1017 10.1016/j.gaitpost.2004.11.010 (2006).
- 1018 82. Ivry, R. Chapter 5 Representational issues in motor learning: Phenomena and theory. In *Motor skills*  
1019 (Elsevier1996), Vol. 2, pp. 263–330.
- 1020 83. Mugler, J. P. & Brookeman, J. R. Three-dimensional magnetization-prepared rapid gradient-echo imaging (3D  
1021 MP RAGE). *Magn. Reson. Med.* **15**, 152–157; 10.1002/mrm.1910150117 (1990).
- 1022 84. Streitbürger, D.-P. *et al.* Impact of image acquisition on voxel-based-morphometry investigations of age-related  
1023 structural brain changes. *NeuroImage* **87**, 170–182; 10.1016/j.neuroimage.2013.10.051 (2014).
- 1024 85. Gaser, C., Dahnke, R., Thompson, P. M., Kurth, F. & Luders, E. *CAT – A Computational Anatomy Toolbox for*  
1025 *the Analysis of Structural MRI Data* (2022).
- 1026 86. Dale, A. M., Fischl, B. & Sereno, M. I. Cortical Surface-Based Analysis. *NeuroImage* **9**, 179–194;  
1027 10.1006/nimg.1998.0395 (1999).
- 1028 87. Fischl, B. & Dale, A. M. Measuring the thickness of the human cerebral cortex from magnetic resonance images.  
1029 *Proc. Natl. Acad. Sci. U.S.A.* **97**, 11050–11055; 10.1073/pnas.200033797 (2000).
- 1030 88. van Essen, D. C. & Drury, H. A. Structural and Functional Analyses of Human Cerebral Cortex Using a Surface-  
1031 Based Atlas. *J. Neurosci.* **17**, 7079–7102; 10.1523/JNEUROSCI.17-18-07079.1997 (1997).
- 1032 89. Petrides, M. *Cytoarchitectonic atlas of the human cerebral cortex. In MNI stereotaxic space* (Academic Press,  
1033 Amsterdam, 2016).
- 1034 90. Alemán-Gómez, Y. *et al.* The Human Cerebral Cortex Flattens during Adolescence. *J. Neurosci.* **33**, 15004–  
1035 15010; 10.1523/JNEUROSCI.1459-13.2013 (2013).
- 1036 91. Luders, E. *et al.* Gender differences in cortical complexity. *Nat Neurosci* **7**, 799–800; 10.1038/nn1277 (2004).

- 1037 92. Chung, Y. S., Hyatt, C. J. & Stevens, M. C. Adolescent maturation of the relationship between cortical  
1038 gyrification and cognitive ability. *NeuroImage* **158**, 319–331; 10.1016/j.neuroimage.2017.06.082 (2017).
- 1039 93. Lehmann, N. *et al.* Longitudinal Reproducibility of Neurite Orientation Dispersion and Density Imaging  
1040 (NODDI) Derived Metrics in the White Matter. *Neuroscience* **457**, 165–185; 10.1016/j.neuroscience.2021.01.005  
1041 (2021).
- 1042 94. Fukutomi, H. *et al.* Neurite imaging reveals microstructural variations in human cerebral cortical gray matter.  
1043 *NeuroImage* **182**, 488–499; 10.1016/j.neuroimage.2018.02.017 (2018).
- 1044 95. Rosseel, Y. lavaan : An R Package for Structural Equation Modeling. *J. Stat. Soft.* **48**; 10.18637/jss.v048.i02  
1045 (2012).
- 1046
